# Supplementary material for: Photoresponse improvement of mixed-dimensional 1D–2D GaAs photodetectors by incorporating constructive interface states
Source: Royal Society of Chemistry journal article supplement (doi:10.1039/d0nr06788a), 2020-12-11
Supplement: d0nr06788a1.pdf [file d0nr06788a1.pdf]

## Supplementary Information

### **Photoresponse improvement of mixed-dimensional 1D-2D GaAs photodetectors through incorporating constructive interface states**

Dengkui Wang <sup>a</sup>, Xue Chen <sup>a</sup>, Xuan Fang <sup>a</sup>, Jilong Tang <sup>a</sup>, Fengyuan Lin <sup>a</sup>, Xinwei  
Wang <sup>a</sup>, Guanlin Liu <sup>a</sup>, Lei Liao <sup>\*,b</sup>, Johnny C. Ho <sup>c</sup>, Zhipeng Wei <sup>\*,a</sup>

<sup>a</sup> *State Key Laboratory of High Power Semiconductor Lasers, Changchun University  
of Science and Technology, Changchun 130022, China*

<sup>b</sup> *State Key Laboratory for Chemo/Biosensing and Chemometrics, School of Physics  
and Electronics, Hunan University, Changsha 410082, China*

<sup>c</sup> *Department of Materials Science and Engineering, City University of Hong Kong,  
Hong Kong SAR 999077, China*

\* Corresponding authors E-mail: zpweicust@126.com; liaolei@whu.edu.cn

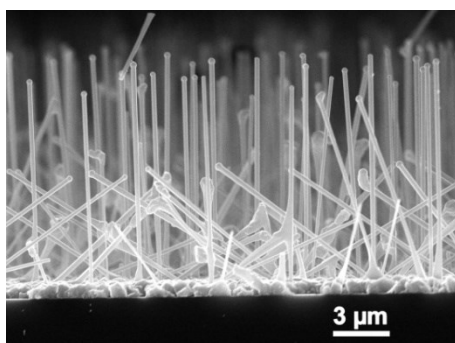

**Figure S1** (a) The side-view SEM image of GaAs NWs.

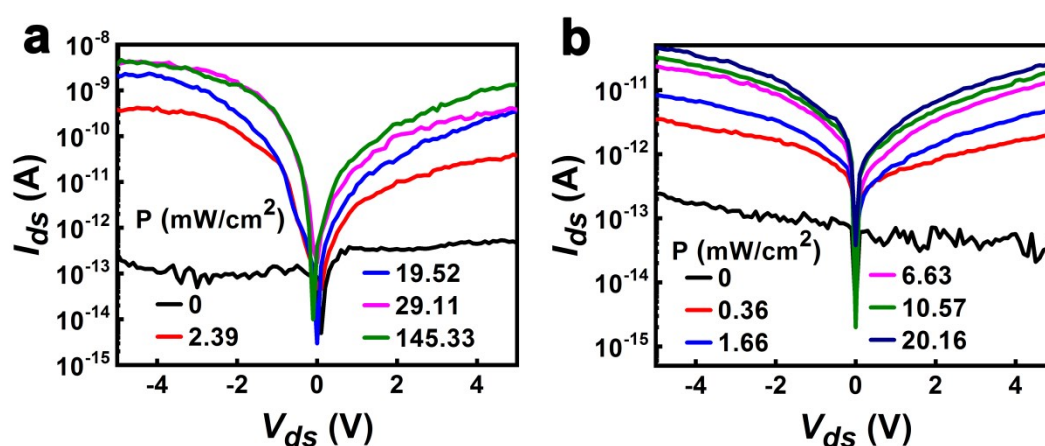

**Figure S2.** (a) The  $I_{ds}$ - $V_{ds}$  curves of GaAs NW photodetector with various laser power densities. (b) The  $I_{ds}$ - $V_{ds}$  curves of GaAs 2DNLS photodetector with various laser power densities.

**The calculation method of the degree of surface bending:**

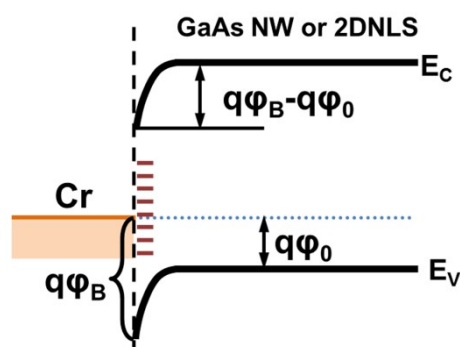

**Figure S3.** The degree of surface bending of GaAs NW or GaAs 2DNLS.

Along with the thermionic emission theory of Schottky junction, the barrier height ( $\phi_B$ ) of the active device material can be calculated by using the following equations.

$$J = J_s \left( \exp\left(\frac{qV}{nkT}\right) - 1 \right) \quad (1)$$

$$q\phi_B = \frac{kT}{q} \ln\left(\frac{A^*T^2}{J_s}\right) \quad (2)$$

where  $J_s$  is saturation current density,  $A^*$  is the effective Richardson constant,  $k$  is the Boltzmann constant,  $T$  is the temperature,  $q$  is the elemental charge, and  $V$  is the applied bias voltage. The  $J_s$  is calculated to be  $5.17 \times 10^{-5} \text{ A cm}^{-2}$  and  $3.01 \times 10^{-5} \text{ A cm}^{-2}$  for GaAs NWs and GaAs 2DNLSs, respectively. So, the barrier height is 0.66 eV and 0.674 eV, respectively. When there are no surface states above or below the semiconductor's Fermi level, the surface Fermi level is equal to the bulk Fermi level of GaAs. At this point, the  $\phi_0$  is equal to 0.473 eV. Thus, the degree of surface bending is 0.187 eV and 0.201 eV for GaAs NWs and GaAs 2DNLSs, which can be calculated by  $\phi_B - \phi_0$ .

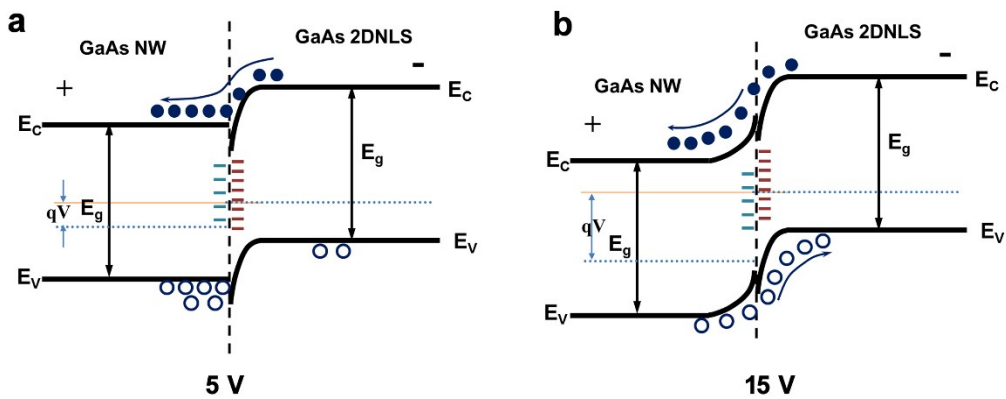

**Figure S4.** The band structures of the mixed-dimensional GaAs photodetector operated at (a) 5V and (b) 15V.

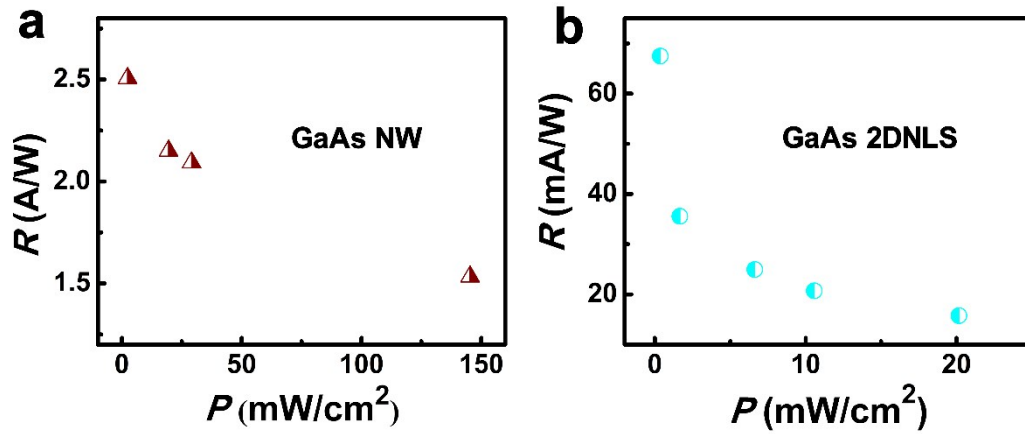

**Figure S5.** Dependences of  $R$  of (a) the GaAs NW photodetector and (b) the GaAs 2DNLS photodetector with different laser power intensities.

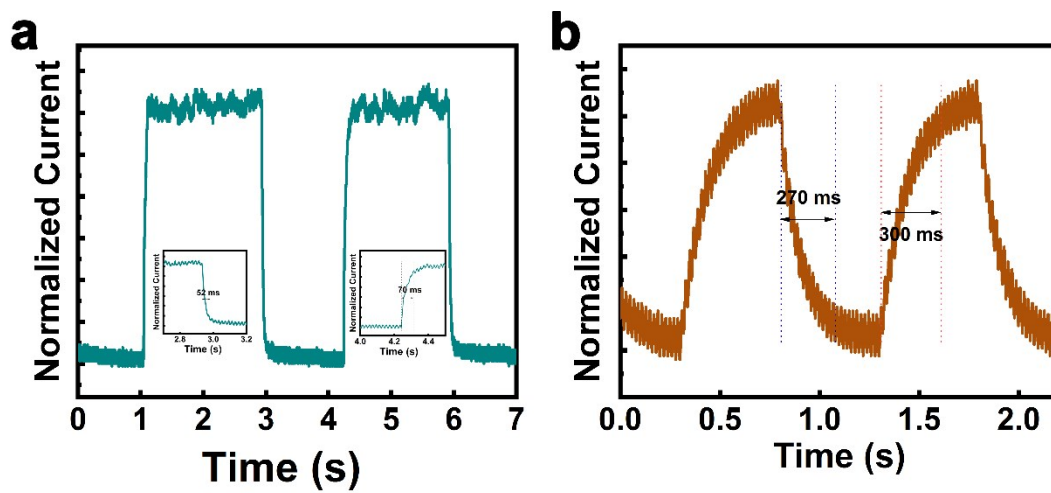

**Figure S6.** Time-dependent photoresponses of GaAs NW photodetector and GaAs 2DNLS photodetector.

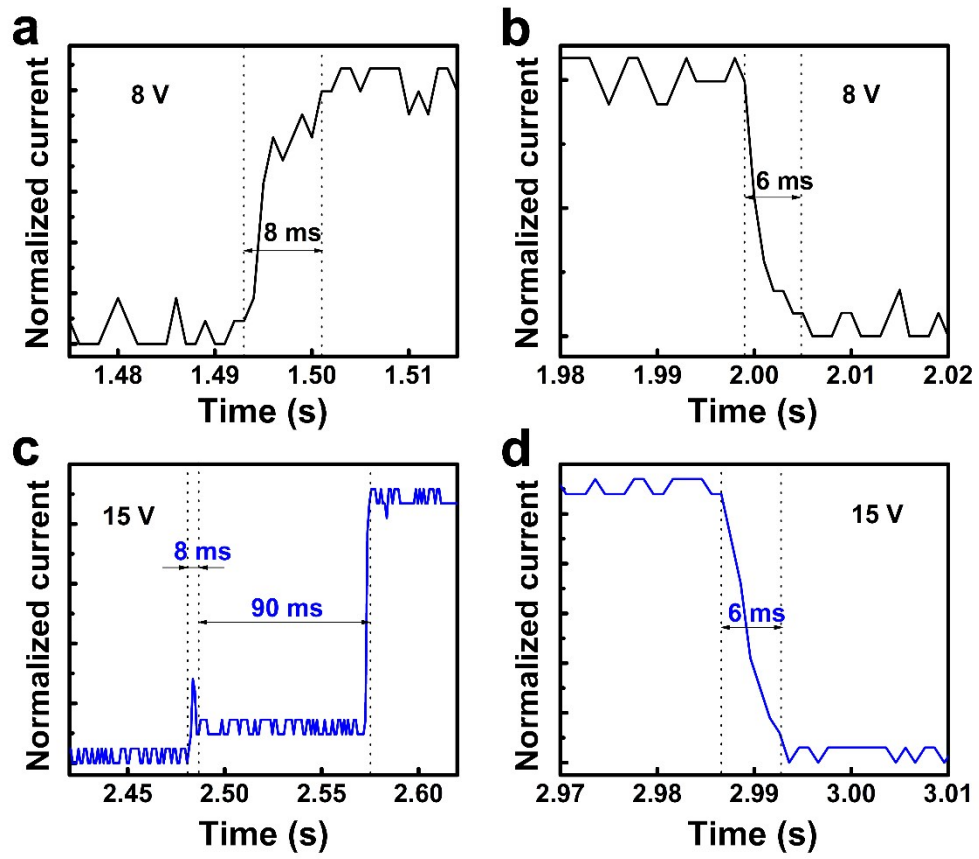

**Figure S7.** The rise time and decay time of mixed-dimensional GaAs NW/GaAs 2DNLS photodetector operated at a bias of (a, b) 8V and (c, b) 15V.
